# Supplementary material for: Direct extraction of carbonyl from waste polycarbonate with amines under environmentally friendly conditions: scope of waste polycarbonate as a carbonylating agent in organic synthesis
Source: Royal Society of Chemistry journal article supplement (doi:10.1039/c4ra14319a), 2014-12-05
Supplement: c4ra14319a1.pdf [file c4ra14319a1.pdf]

## Electronic Supplementary information for

### Two in one environment friendly chemical recycling of polycarbonate and harvesting preserved carbonyl for urea derivative synthesis.

Sukhdeep Singh<sup>\*a</sup>, Yong Lei<sup>b</sup> and Andreas Schober<sup>a</sup>

<sup>a</sup> Department of Nanobiosystem Technology, Institute of Micro- and Nanotechnologies MacroNano®, Institute of Chemistry and Biotechnology, Ilmenau University of Technology, Prof.-Schmidt-Str. 26 / Heliosbau, 98693 Ilmenau, Germany Fax: +49 3677 69-3379

<sup>b</sup> Department of 3D Nanostructuring, Institute for Physics & IMN MacroNano® (ZIK), Ilmenau University of Technology, Prof. Schmidt Str. 26, 98693 Ilmenau, Germany

Corresponding author e-mail: [sukhdeep.singh@tu-ilmenau.de](mailto:sukhdeep.singh@tu-ilmenau.de)

#### Materials and Methods

<sup>1</sup>H/<sup>13</sup>C NMR (300/75 MHz; CDCl<sub>3</sub>) spectra were recorded using commercial available deuterated solvents on multinuclear spectrometer Bruker 300 MHz. Data analysis was done by using MestReNova v8.1.0-11315 software. NMR is reported as follows: chemical shifts (multiplicity [singlet (s), doublet (d), double doublet (dd) triplet (t), quartet (q), AB quartet (ABq), broad (br), and multiplet (m)], coupling constant [Hz], integration). IR spectra were recorded on Jasco FTIR 6300 spectrophotometer only significant peaks are presented. Aligent 1200 series HPLC coupled with esquire 6000 mass spectrometer was used to investigate the reactions in LCMS. Thin layer chromatography (TLC) was performed on Merck (60F254, 0.2 mm) using an appropriate solvent system. The chromatograms were visualized under UV light. Most of the products crystallized in ethanol. All solvents and liquid reagents were dried with appropriate reagents before use. Commercially available amines, laboratory grade ethanol and polycarbonate used without any further purification. All the reactions we performed in Teflon capped 4 ml glass vials under shaking conditions.

#### Examples of N,N'-dibenzylureas

##### N,N'-bis-benzylurea 3a

Isolated yield 58%; white crystalline solid; [Found: C, 75.16; H, 6.97; N, 5.36. C<sub>15</sub>H<sub>16</sub>N<sub>2</sub>O requires: C, 74.97; H, 6.71; N, 11.66 %];  $\nu_{\max}$  (neat)

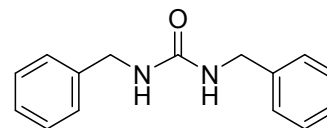

3317,1567, 1241 cm<sup>-1</sup>; <sup>1</sup>H-NMR (300 MHz, CDCl<sub>3</sub>):  $\delta$  4.34 (s, 4H), 7.23- 7.34 (m, 10H); <sup>13</sup>C NMR (75

MHz, CDCl<sub>3</sub>):  $\delta$  44.5, 127.4, 128.6, 138.9, 158.1; MS (ESI) calcd. for C<sub>15</sub>H<sub>16</sub>N<sub>2</sub>O (m/z): 240.13 found [MH]<sup>+</sup> 241.2.

### **N,N'-bis-(4-methoxybenzyl)urea 3b**

Isolated yield 62%; white solid; [Found: C, 68.30; H, 6.49; N, 9.85. C<sub>17</sub>H<sub>20</sub>N<sub>2</sub>O<sub>3</sub> requires: C, 67.98; H, 6.71; N, 9.33 %];  $\nu_{\max}$

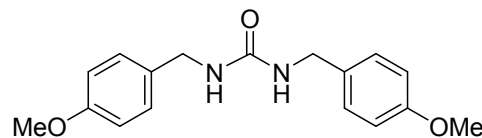

(neat) 3316, 1575, 1236 cm<sup>-1</sup>; <sup>1</sup>H-NMR (300 MHz, DMSO):  $\delta$  3.73 (s, 6H), 4.15 (d, 4H, J 6.0 Hz), 6.30 (t, 2H, J 6.0 Hz), 6.87 (d, 4H, J 8.4), 7.17 (d, 4H, J 8.4 Hz); <sup>13</sup>C NMR (75 MHz, DMSO):  $\delta$  42.3, 55.0, 113.5, 128.2, 132.7, 158.0; MS (ESI) calcd. for C<sub>17</sub>H<sub>20</sub>N<sub>2</sub>O<sub>3</sub> (m/z): 300.15 found [MH]<sup>+</sup> 301.3.

### **N,N'-bis-(3-methoxybenzyl)urea 3c**

Isolated yield 60%; white solid; [Found: C, 68.21; H, 6.54; N, 10.27.

C<sub>17</sub>H<sub>20</sub>N<sub>2</sub>O<sub>3</sub> requires: C, 67.98; H, 6.71; N, 9.33 %];  $\nu_{\max}$  (neat) 3307,

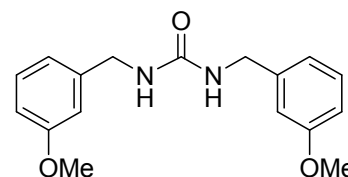

1568, 1261 cm<sup>-1</sup>; <sup>1</sup>H-NMR (300 MHz, DMSO):  $\delta$  3.73 (s, 6H), 4.21 (d, 4H, J 6.0 Hz), 6.45 (t, 2H, J 6.0 Hz), 6.82 (m, 6H), 7.23 (m, 2H); <sup>13</sup>C NMR (75 MHz, DMSO):  $\delta$  42.8, 54.8, 111.8, 112.4, 119.0, 129.2, 142.5, 144.1, 158.0; MS (ESI) calcd. for C<sub>17</sub>H<sub>20</sub>N<sub>2</sub>O<sub>3</sub> (m/z): 300.15 found [MH]<sup>+</sup> 301.4.

### **N,N'-bis-(4-fluorobenzyl)urea 3d**

Isolated yield 52%; white solid; [Found: C, 65.26; H, 4.73; N,

11.09. C<sub>15</sub>H<sub>14</sub>F<sub>2</sub>N<sub>2</sub>O requires: C, 65.21; H, 5.11; N, 10.14 %];  $\nu_{\max}$

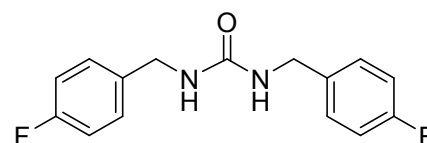

(neat) 3317, 1571, 1219 cm<sup>-1</sup>; <sup>1</sup>H-NMR (300 MHz, DMSO):  $\delta$  4.21 (d, 4H, J 6.0 Hz), 6.49 (t, 2H, J 6.0 Hz), 7.11-7.31 (m, 8H); <sup>13</sup>C NMR (75 MHz, DMSO):  $\delta$  42.2, 114.7, 115.0, 128.8, 128.9, 137.0, 157.9; MS (ESI) calcd. for C<sub>15</sub>H<sub>14</sub>F<sub>2</sub>N<sub>2</sub>O (m/z): 276.11 found [MH]<sup>+</sup> 277.3.

### **N,N'-bis-(3-(trifluoromethyl)benzyl)urea 3f**

Isolated yield 28%; white solid; [Found: C, 54.15; H, 3.80; N,

7.45. C<sub>17</sub>H<sub>14</sub>F<sub>6</sub>N<sub>2</sub>O requires: C, 54.26; H, 3.75; N, 7.44 %];

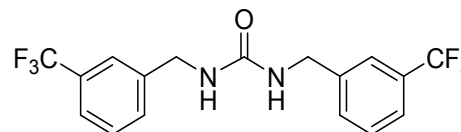

<sup>1</sup>H-NMR (300 MHz, DMSO):  $\delta$  4.32 (d, 4H, J 6.0 Hz), 6.74 (t, 2H, J 6.0 Hz), 7.54-7.59 (m, 8H); <sup>13</sup>C

NMR (75 MHz, DMSO):  $\delta$  42.4, 123.1, 129.1, 130.9, 142.6, 158.0; MS (ESI) calcd. for  $C_{17}H_{14}F_6N_2O$  (m/z): 376.10 found  $[MH]^+$  377.3.

### **N,N'-bis-(4-(trifluoromethyl)benzyl)urea 3g**

Isolated yield 48%; white solid; [Found: C, 54.19; H, 3.82; N,

7.39.  $C_{17}H_{14}F_6N_2O$  requires: C, 54.26; H, 3.75; N, 7.44 %];  $\nu_{max}$

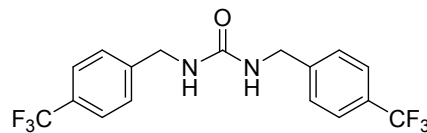

(neat) 3334, 1620, 1582, 1326, 1095  $cm^{-1}$ ;  $^1H$ -NMR (300 MHz, DMSO):  $\delta$  4.32 (d, 4H, J 6.0 Hz), 6.71 (t, 2H, J 6.0 Hz), 7.46 (d, 4H, J 9.0 Hz), 7.70 (d, 4H, J 9.0 Hz);  $^{13}C$  NMR (75 MHz, DMSO):  $\delta$  42.57, 125.0, 127.5, 134.4, 158.0; MS (ESI) calcd. for  $C_{17}H_{14}F_6N_2O$  (m/z): 376.10 found  $[MH]^+$  377.3.

### **N,N'-dibenzhydrylurea 3h**

Isolated yield 81%; white solid; [Found: C, 82.61; H, 6.28; N, 7.78.

$C_{27}H_{24}N_2O$  requires: C, 82.62; H, 6.16; N, 7.14 %];  $\nu_{max}$  (neat) 3306,

1560, 1270  $cm^{-1}$ ;  $^1H$ -NMR (300 MHz, DMSO):  $\delta$  5.87 (d, 2H, J 8.4 Hz),

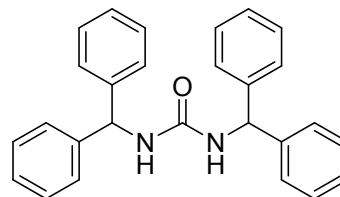

6.96 (d, 2H, J 8.4 Hz,  $D_2O$  exchangeable), 7.22-7.35 (m, 20H);  $^{13}C$  NMR (75 MHz, DMSO):  $\delta$  56.8, 126.7, 128.3, 143.5, 156.2; MS (ESI) calcd. for  $C_{27}H_{24}N_2O$  (m/z): 392.19 found  $[MH]^+$  393.5.

### **N,N'-bis-(4-aminobenzyl)urea 3j**

Isolated yield 72%; white solid; [Found: C, 66.60; H, 6.87; N,

20.36.  $C_{15}H_{18}N_4O$  requires: C, 66.64; H, 6.71; N, 20.73 %];  $\nu_{max}$

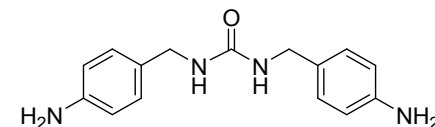

(neat) 3316, 1609, 1559, 1514, 1238  $cm^{-1}$ ;  $^1H$ -NMR (300 MHz, DMSO):  $\delta$  4.03 (d, 4H, J 6.0 Hz), 4.94 (s, 4H,  $D_2O$  exchangeable), 6.05 (t, 2H, J 6.0 Hz,  $D_2O$  exchangeable), 6.50 (d, 4H, J 9.0 Hz), 6.91 (d, 4H, J 9.0 Hz);  $^{13}C$  NMR (75 MHz, DMSO):  $\delta$  42.7, 113.6, 127.5, 128.0, 142.3, 157.9; MS (ESI) calcd. for  $C_{15}H_{18}N_4O$  (m/z): 270.15 found  $[MH]^+$  271.3.

### **Examples of N,N'-dialkylureas**

### N,N'-dimethylurea 3k

The NMR of the third crop is taken which contain little amount of BPA as well. The peaks corresponding to diemethyl urea are given. <sup>1</sup>H-NMR (300 MHz, DMSO): δ 2.53 (s,6H), 5.75 (s, 2H, D<sub>2</sub>O exchangeable)

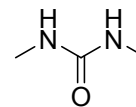

### Urea 3l

Isolated yield 68%; white solid; [Found: C, 20.70; H, 6.66; N, 44.48. CH<sub>4</sub>N<sub>2</sub>O requires:

C, 20.00; H, 6.71; N, 46.65 %];  $\nu_{\max}$  (neat) 3428, 3333, 1673, 1589, 1458 cm<sup>-1</sup>; <sup>1</sup>H-NMR

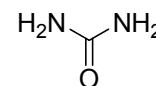

(300 MHz, DMSO): δ 5.47 (s, D<sub>2</sub>O exchangeable); <sup>13</sup>C NMR (75 MHz, DMSO): δ 159.6; MS (ESI) calcd. for CH<sub>4</sub>N<sub>2</sub>O (m/z): 60.03 found [MH]<sup>+</sup> 61.1.

### N,N'-didecylurea 3m

Isolated yield 78%; white solid; [Found: C, 74.00; H, 13.24; N, 7.96. C<sub>39</sub>H<sub>32</sub>N<sub>2</sub>O requires: C, 74.06; H, 13.02; N, 8.23 %];  $\nu_{\max}$  (neat) 3335, 2955, 2918, 2848, 1610, 1570, 1465 cm<sup>-1</sup>. The compound was not soluble in many organic solvents.

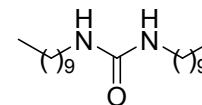

### N,N'-dicyclohexylurea 3n

Isolated yield 81%; white solid; [Found: C, 69.55; H, 10.76; N, 12.37.

C<sub>13</sub>H<sub>24</sub>N<sub>2</sub>O requires: C, 69.60; H, 10.78; N, 12.49 %];  $\nu_{\max}$  (neat) 3321, 2927,

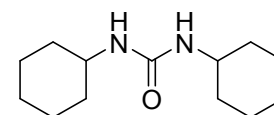

2850, 1623, 1567, 1241 cm<sup>-1</sup>; <sup>1</sup>H-NMR (300 MHz, DMSO): δ 1.02-1.28 (m,

11H), 1.49-1.75 (m, 11H), 5.59 (d, 2H, J 9.0 Hz, D<sub>2</sub>O exchangeable) ; MS (ESI) calcd. for C<sub>13</sub>H<sub>24</sub>N<sub>2</sub>O (m/z): 224.19 found [MH]<sup>+</sup> 225.3.

### N,N'-dipropargylurea 3o

Isolated yield 72%; cream solid; [Found: C, 62.04; H, 6.04; N, 20.70. C<sub>7</sub>H<sub>8</sub>N<sub>2</sub>O

requires: C, 61.75; H, 5.92; N, 20.58 %];  $\nu_{\max}$  (neat) 3316, 3293, 3271, 1592,

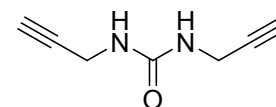

1250 cm<sup>-1</sup>; <sup>1</sup>H-NMR (300 MHz, DMSO): δ 3.07 (t, 2H, J 2.4 Hz), 3.80 (dd, 4H, J 5.7 Hz, 2.4 Hz), 6.34 (t,

2H, J 5.7 Hz, D<sub>2</sub>O exchangeable); <sup>13</sup>C NMR (75 MHz, DMSO): δ 28.8, 72.6, 82.3, 156.9; MS (ESI)  
calcd. for C<sub>7</sub>H<sub>8</sub>N<sub>2</sub>O (m/z): 136.06 found [MH]<sup>+</sup> 137.1.

**Copy of NMR spectra**

**N,N'-bis-benzylurea 3a**

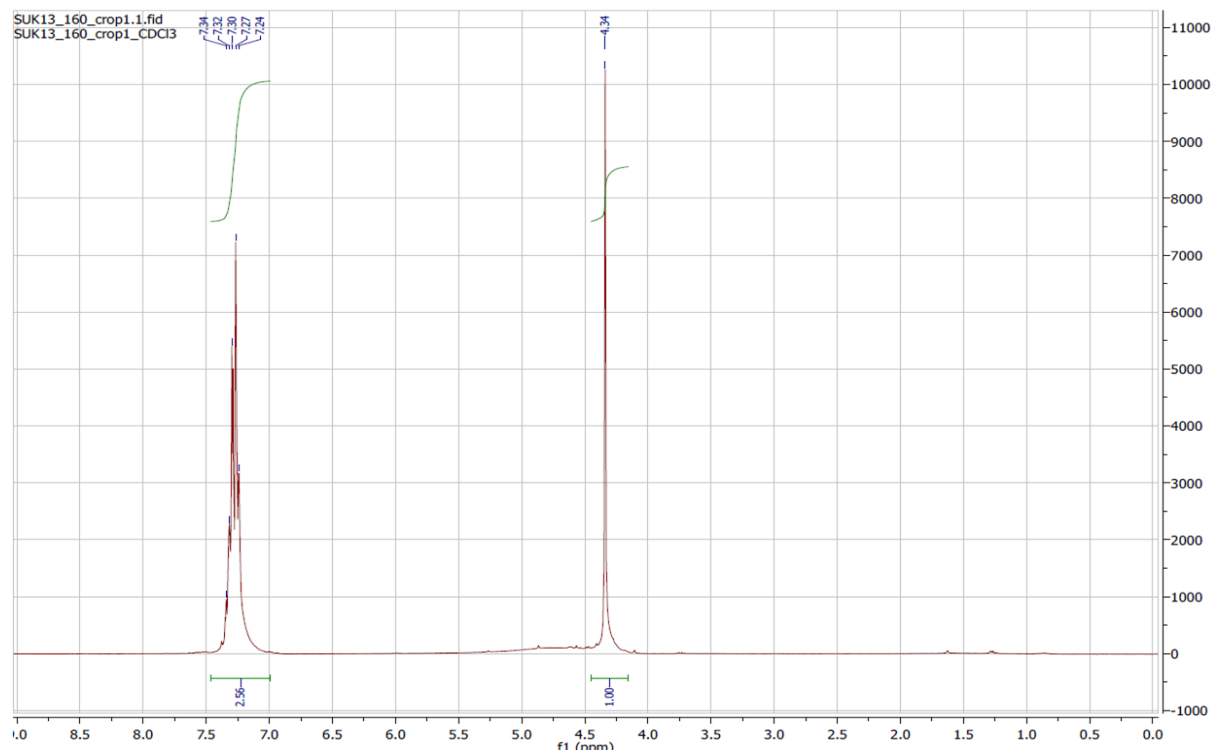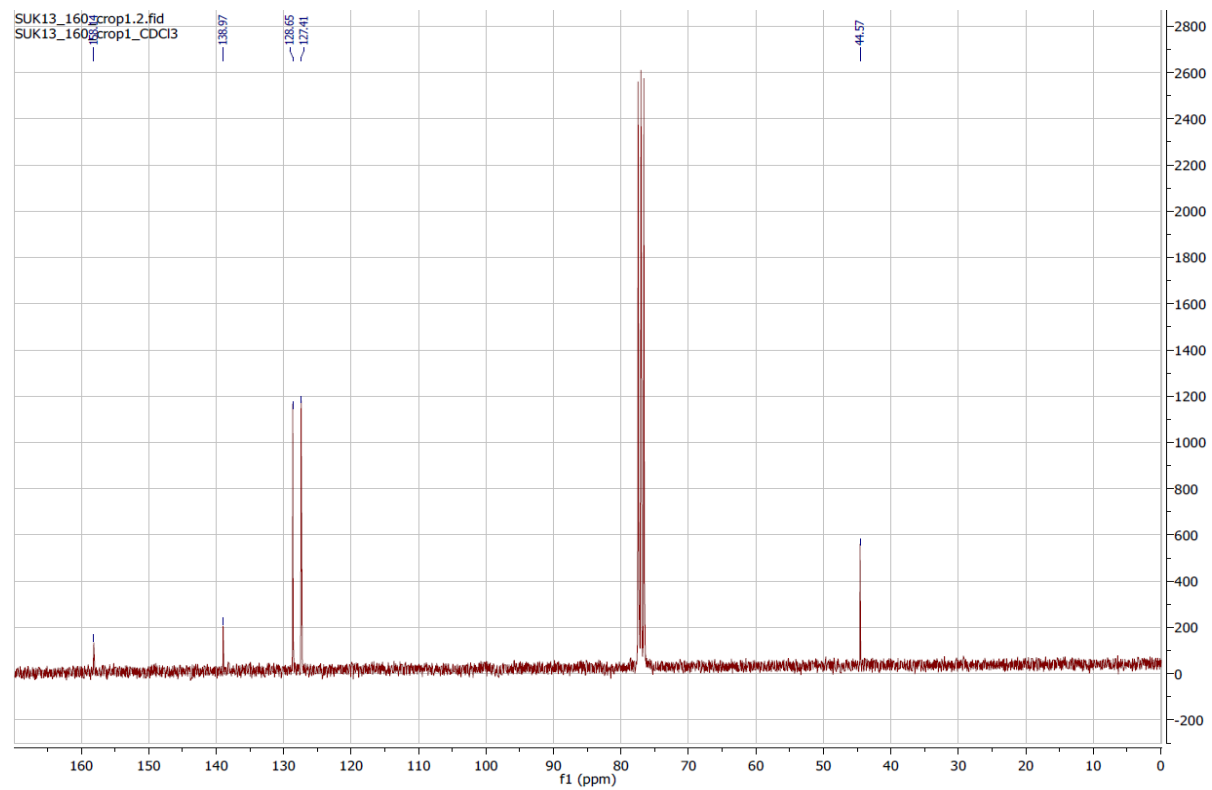

**N,N'-bis-(4-methoxybenzyl)urea 3b**

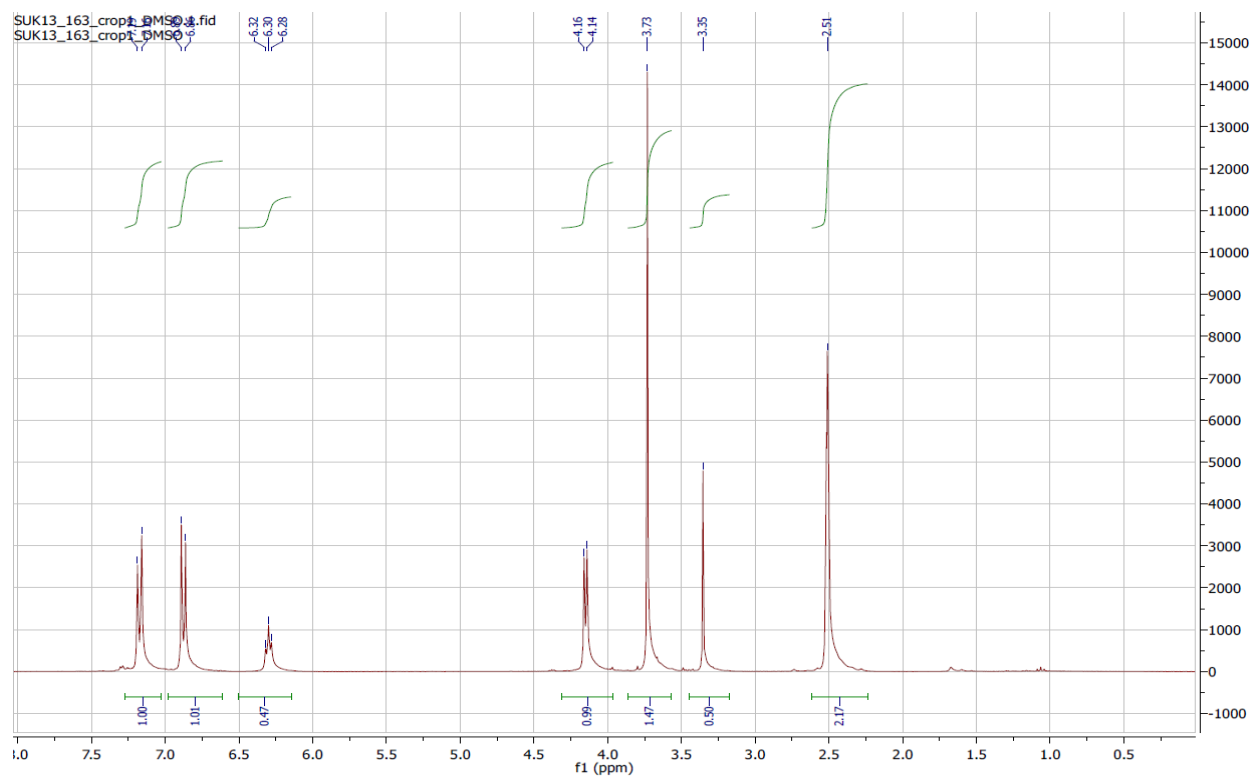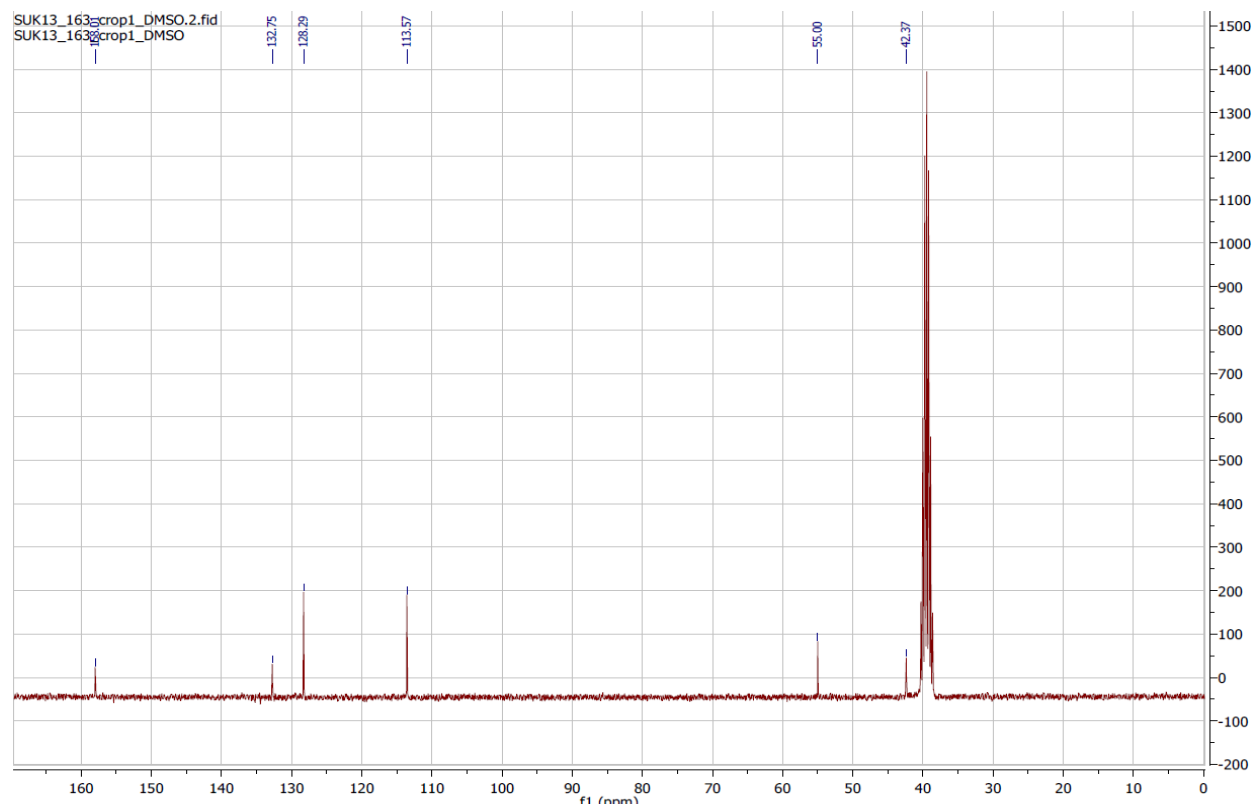

**N,N'-bis-(3-methoxybenzyl)urea 3c**

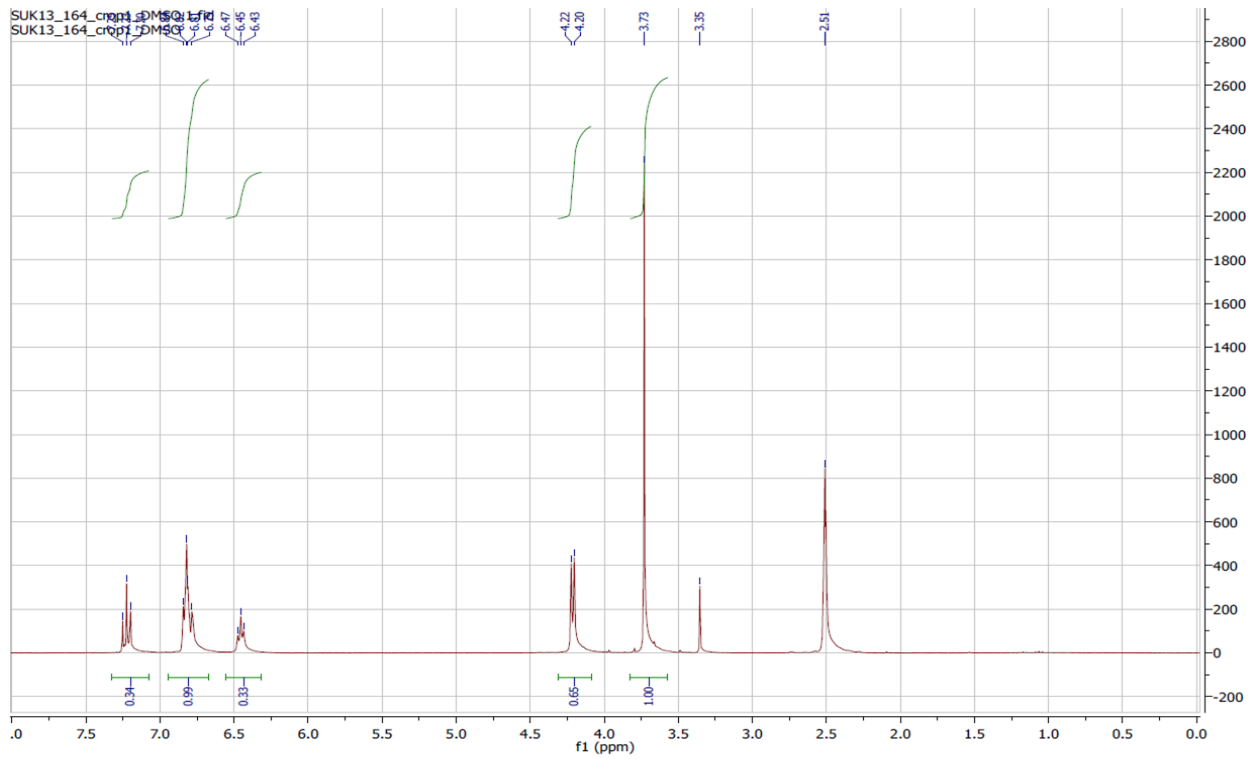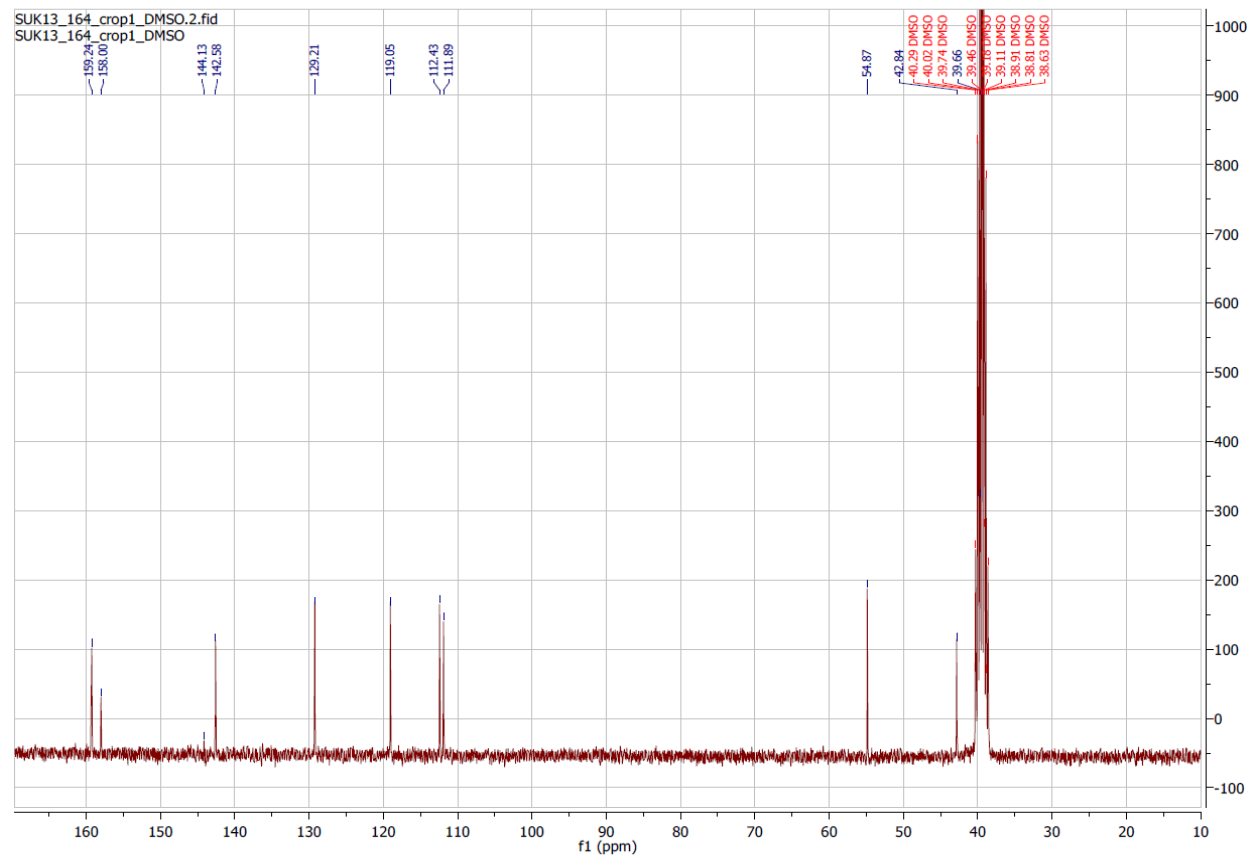

**N,N'-bis-(4-fluorobenzyl)urea 3d**



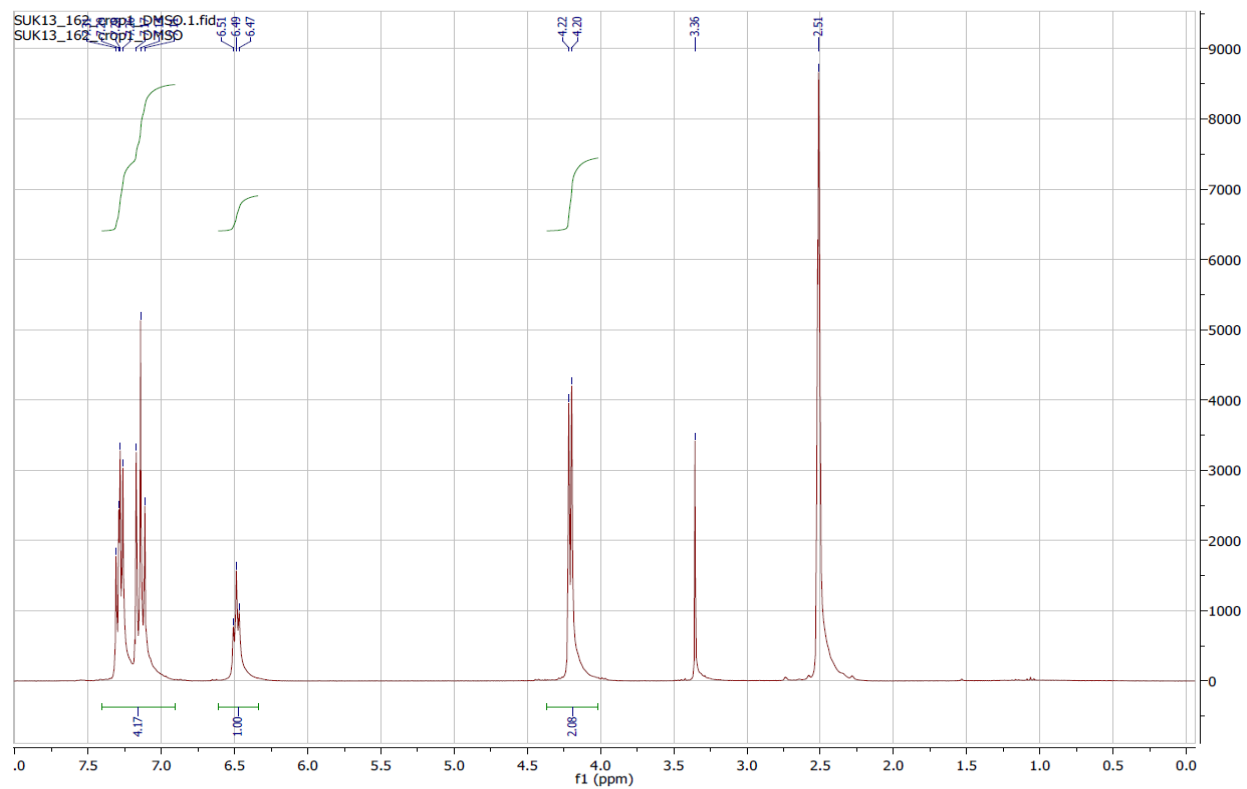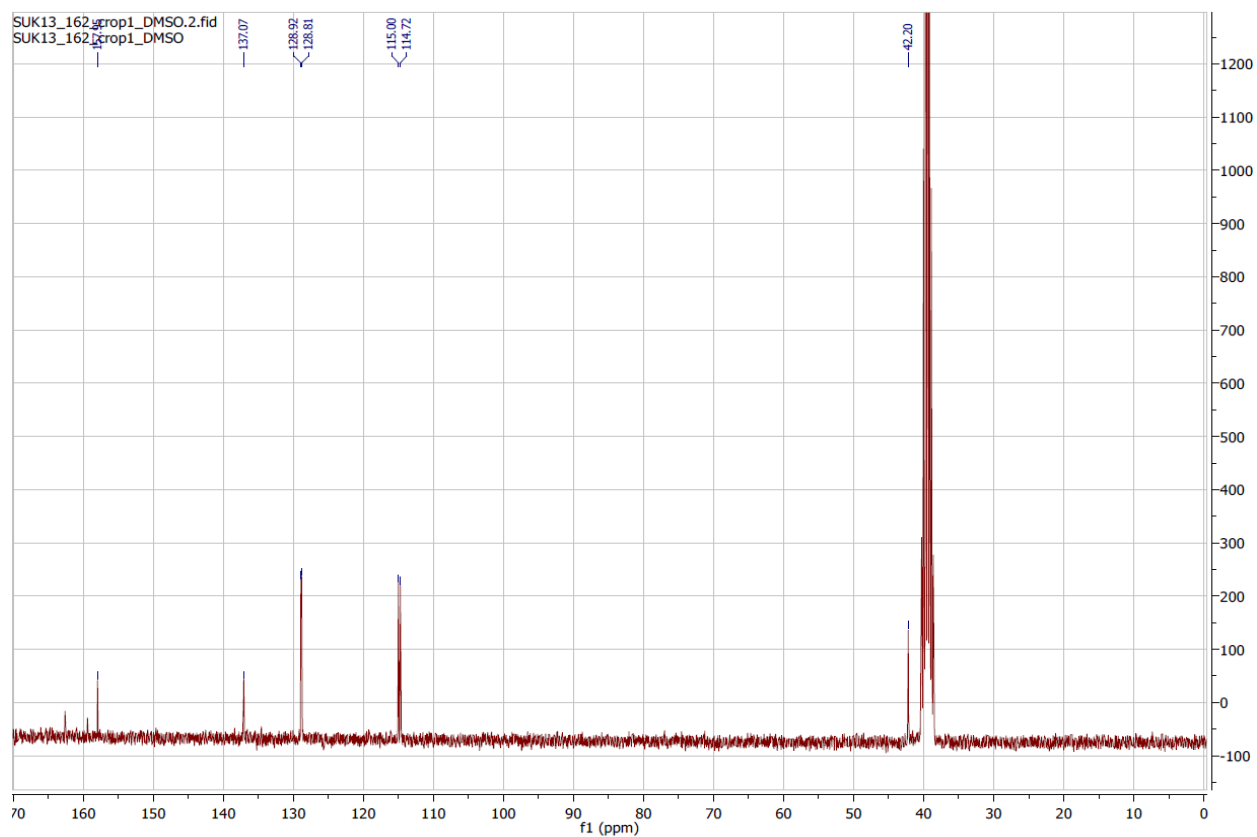

**N,N'-bis-(3-(trifluoromethyl)benzyl)urea 3f**

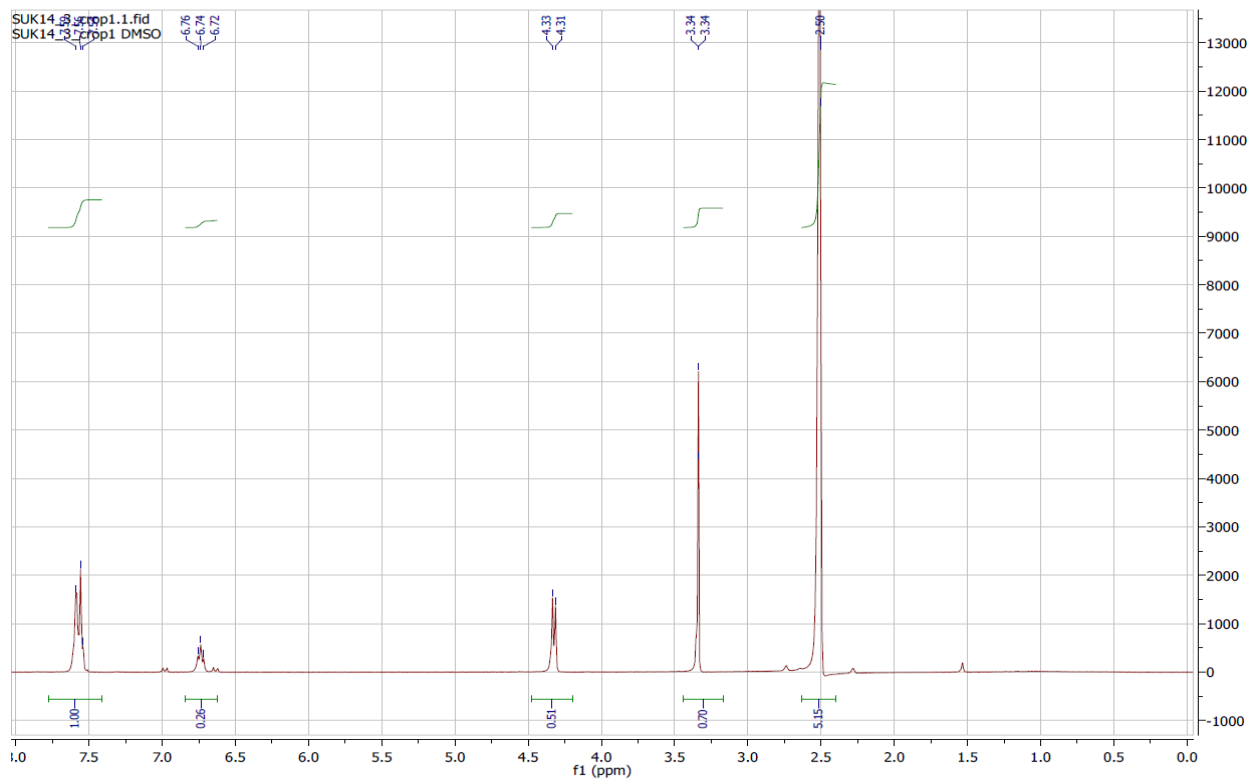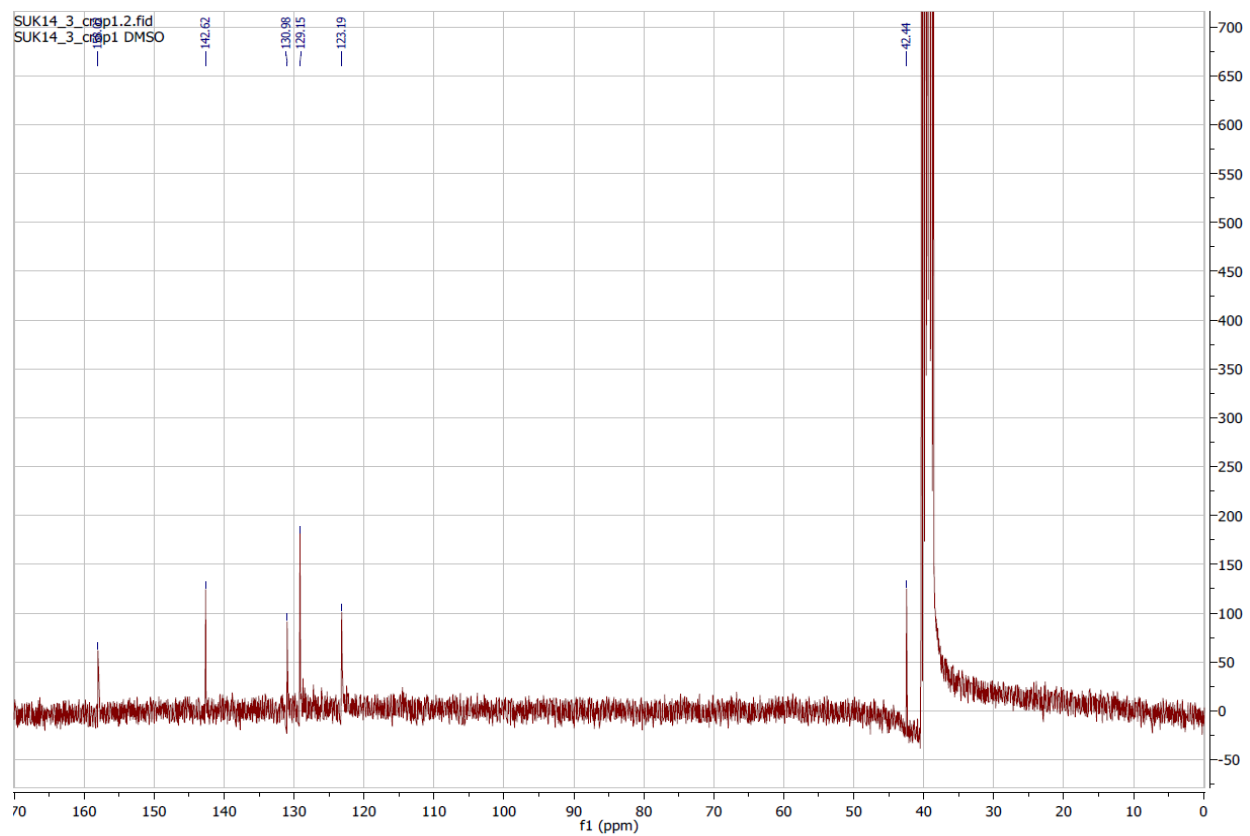

**N,N'-bis-(4-(trifluoromethyl)benzyl)urea 3g**

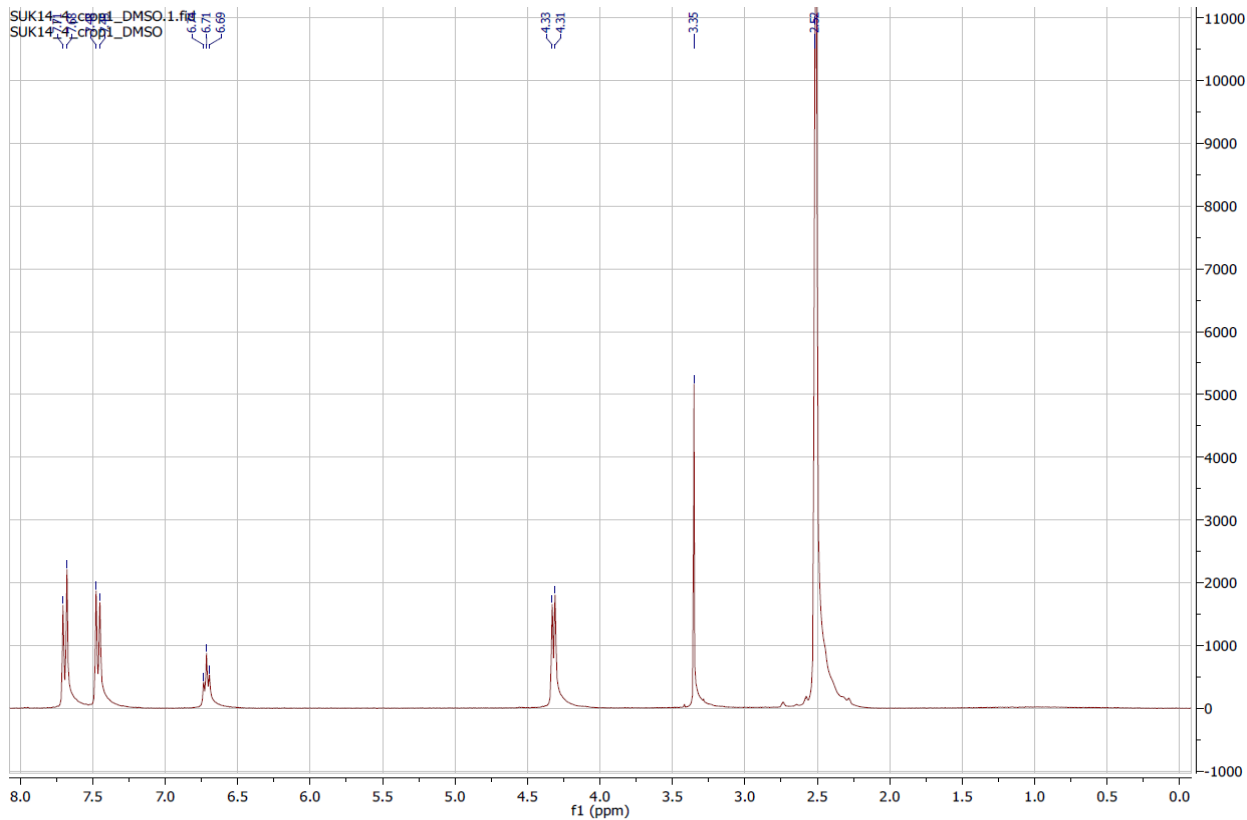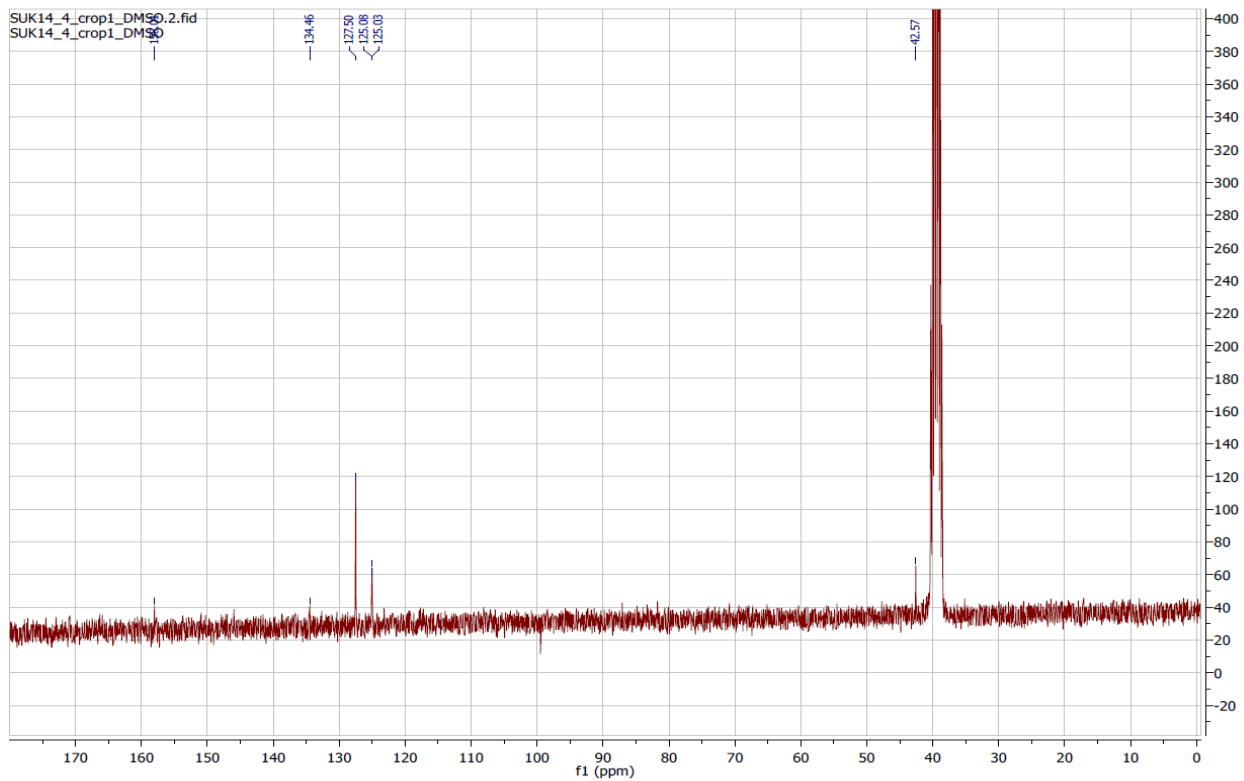

# N,N'-dibenzhydrylurea 3h

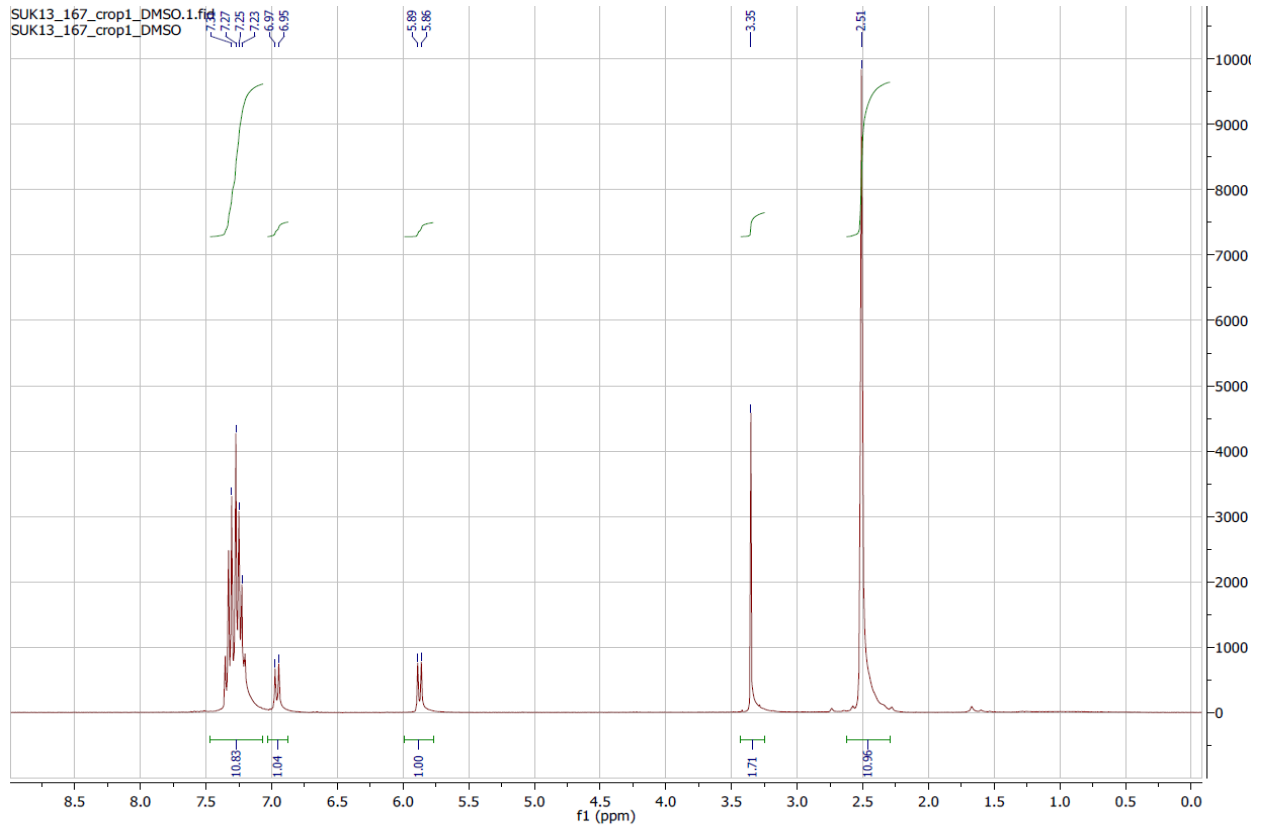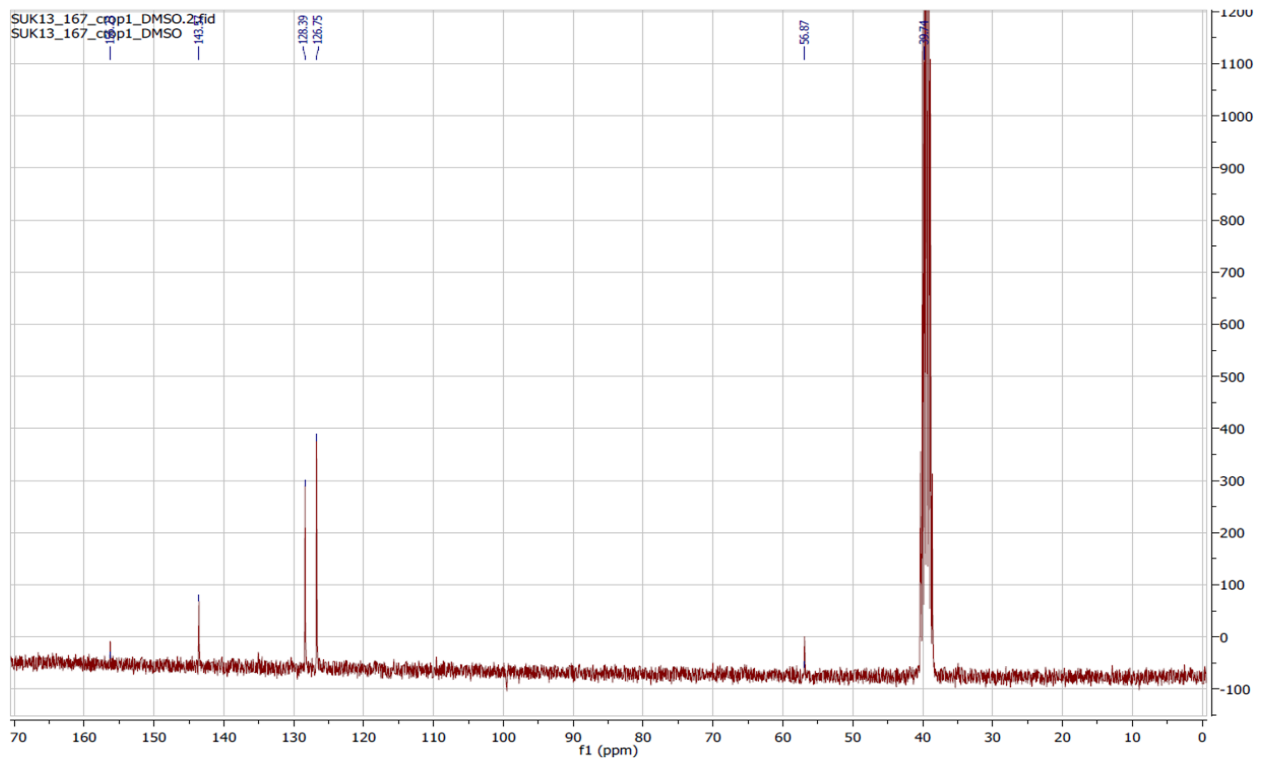

# N,N'-bis-(4-aminobenzyl)urea 3j

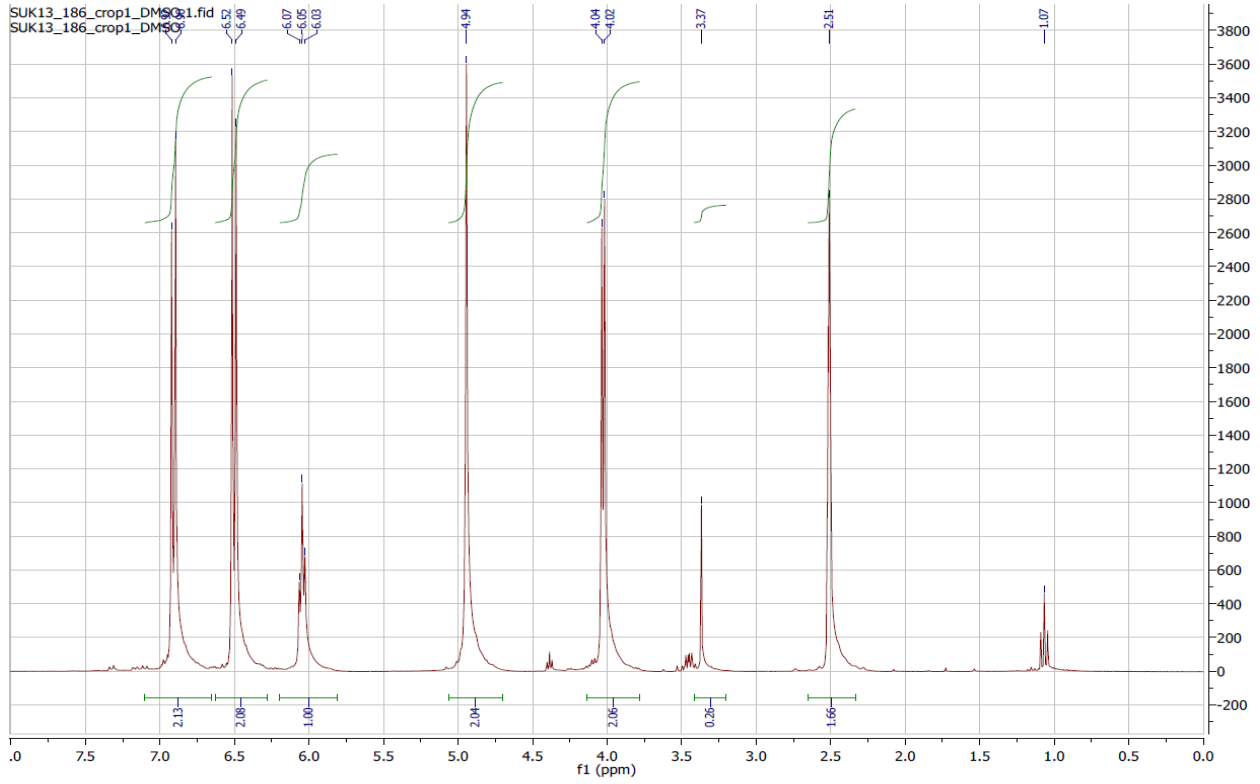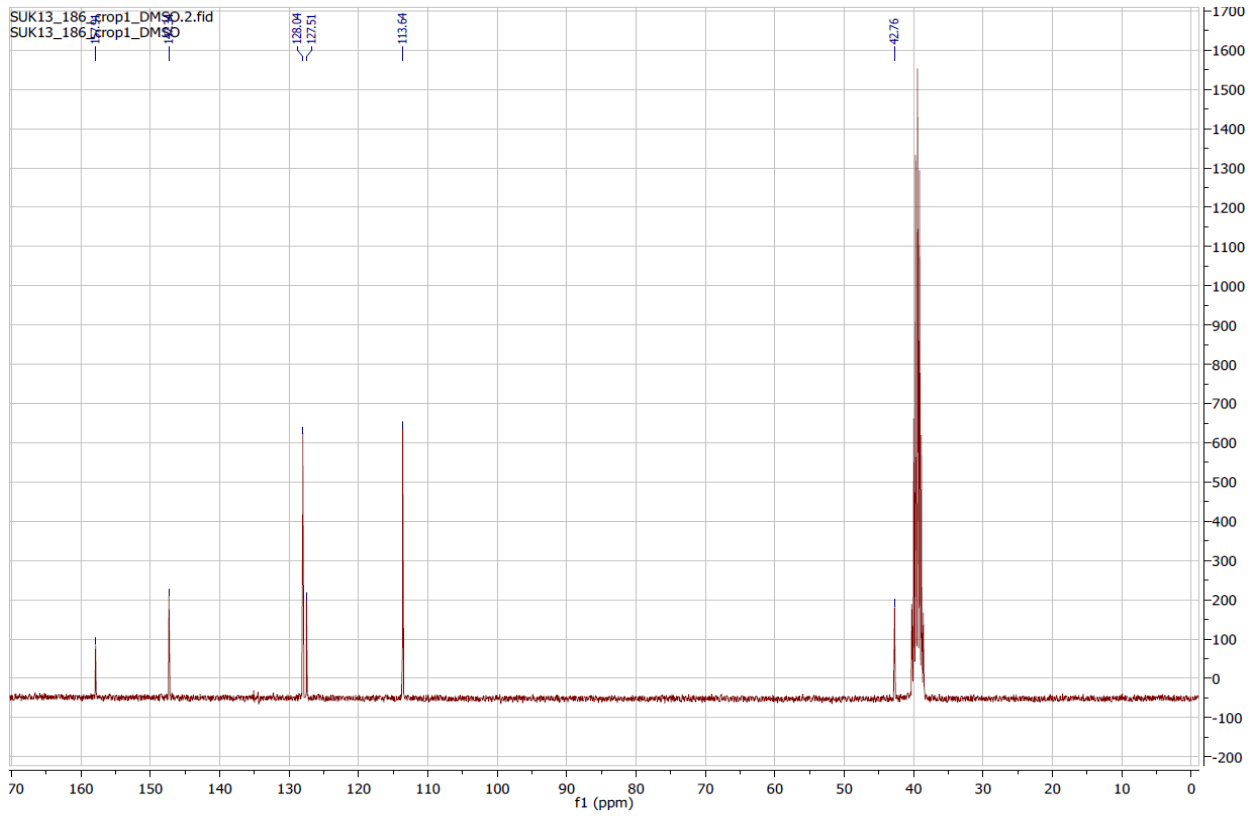

# N,N'-dimethylurea + Bisphenol A mixture 3k

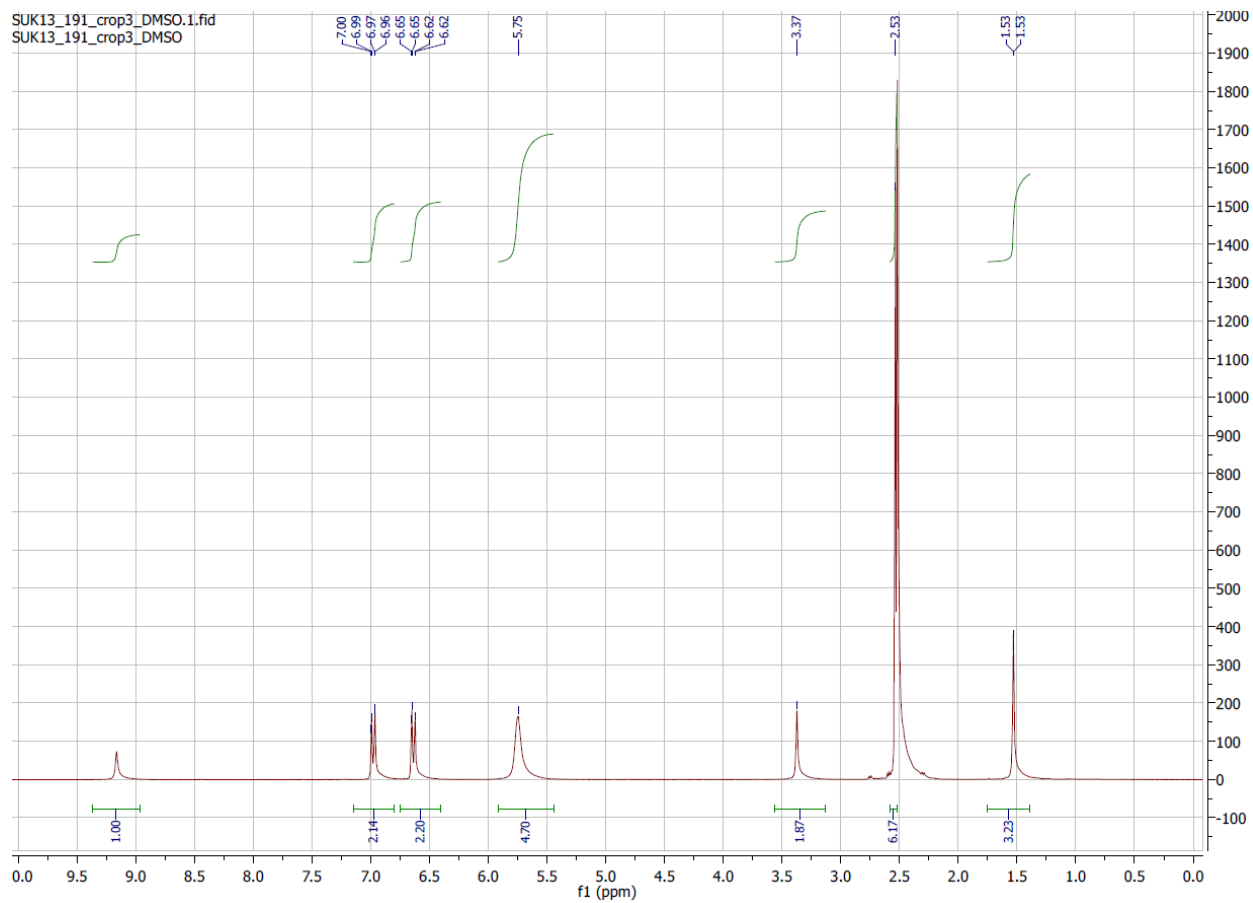

# Urea 3I

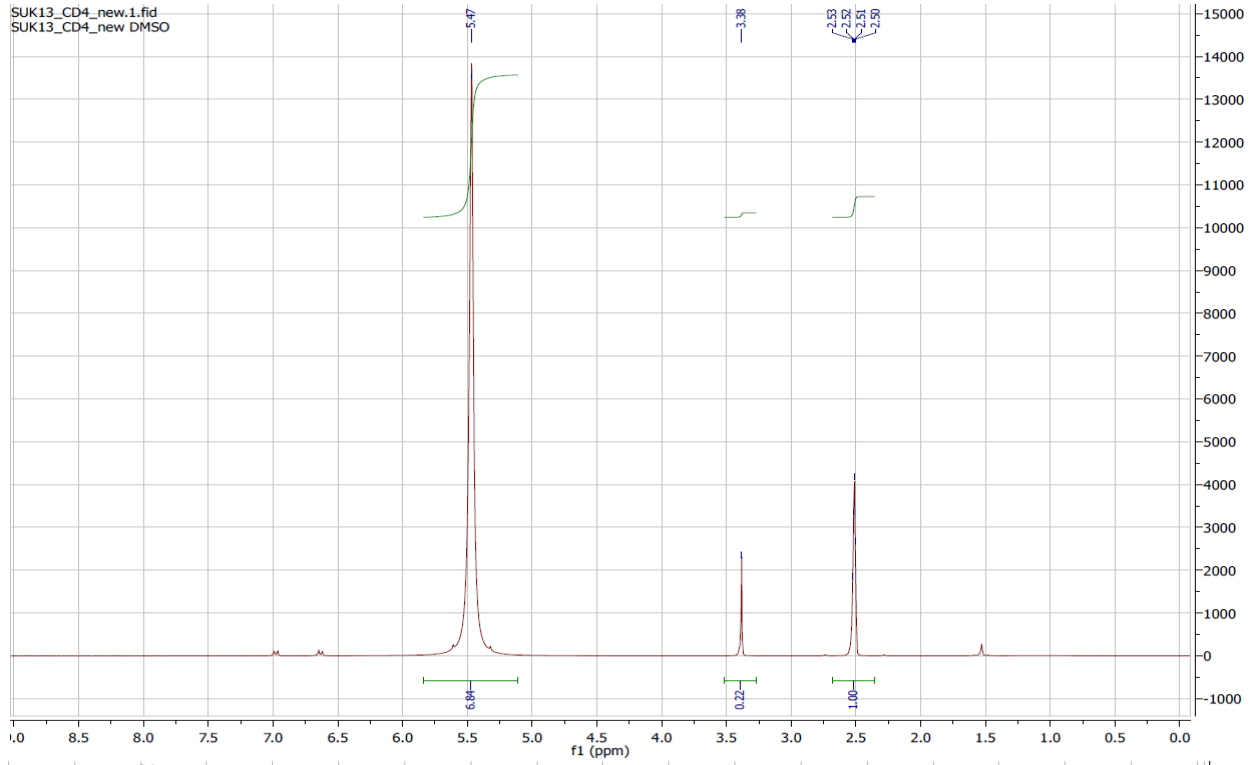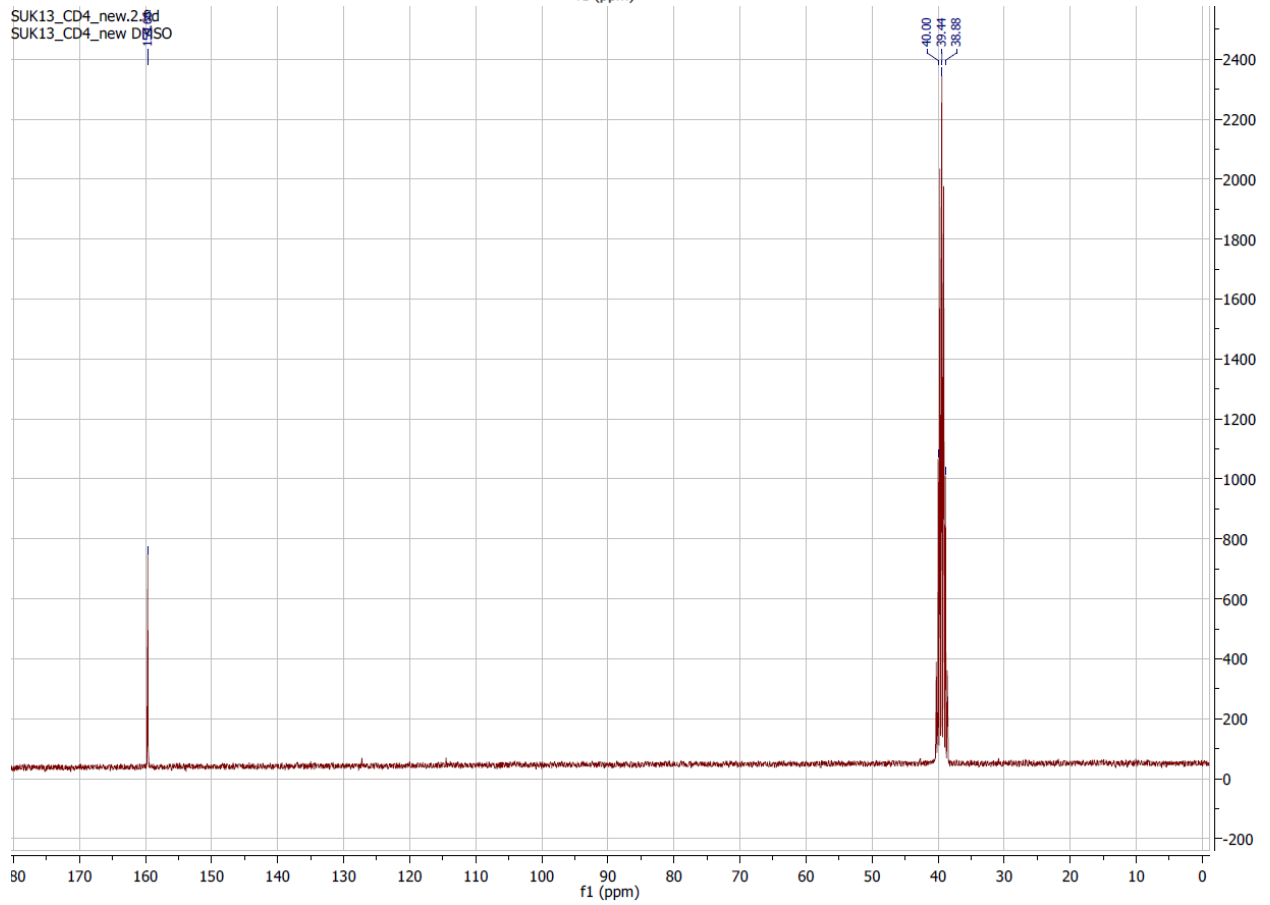

# N,N'-dicyclohexylurea 3n

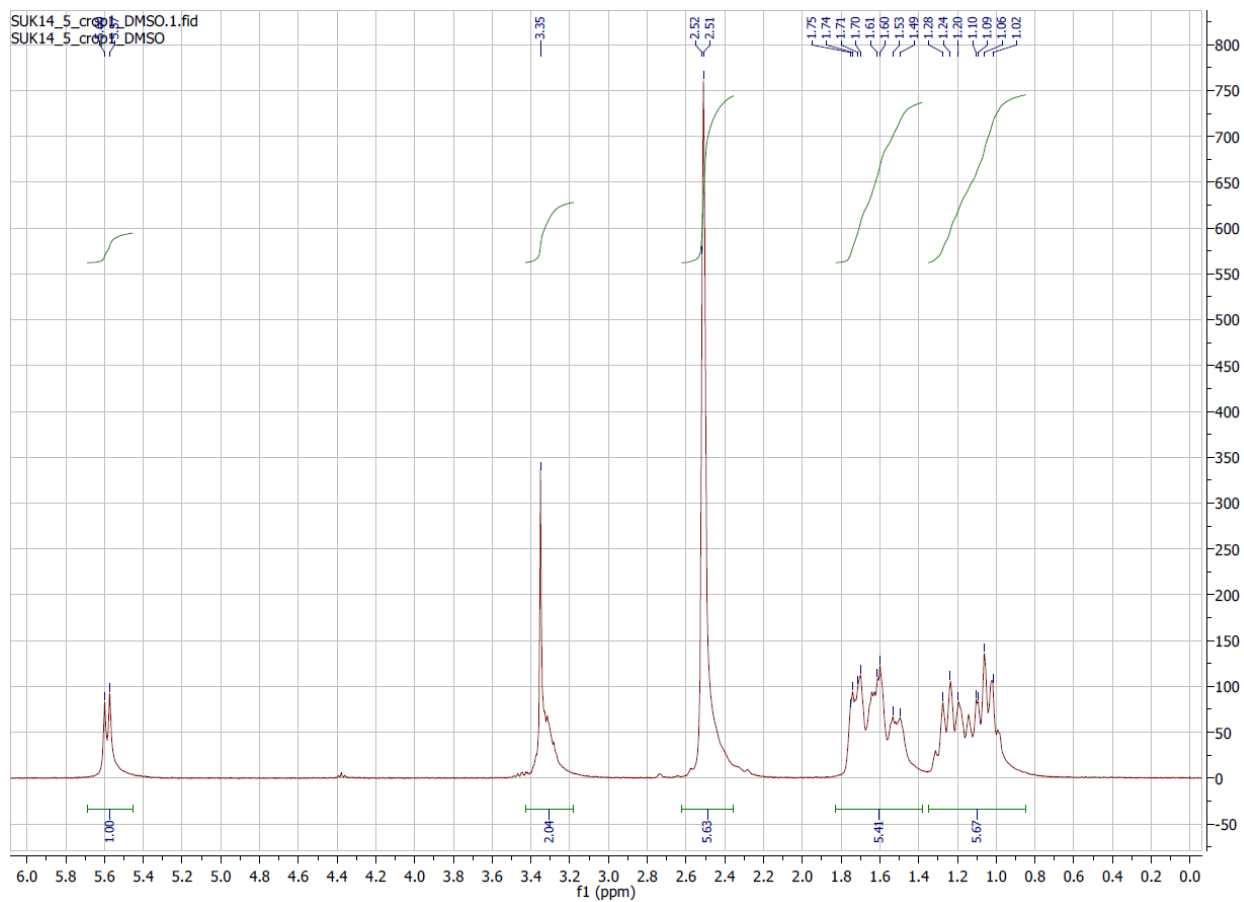



# N,N'-dipropargylurea 3o

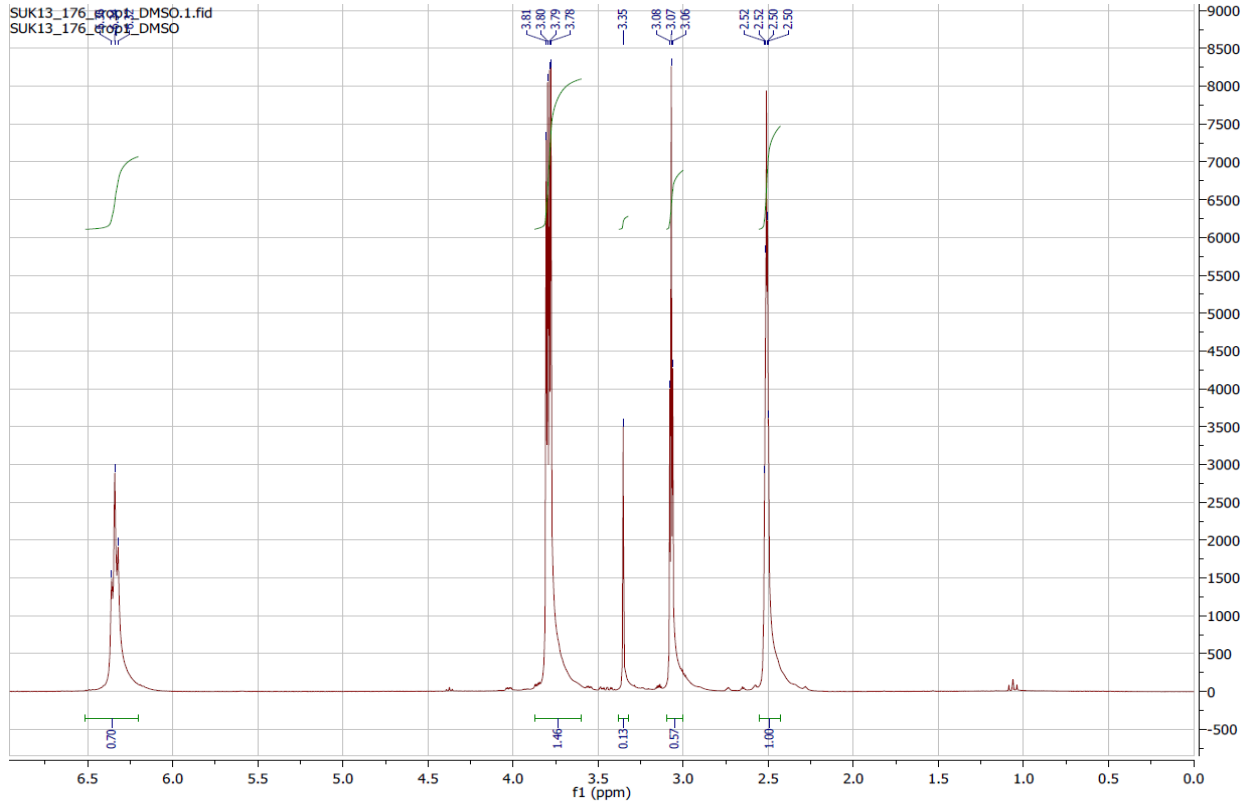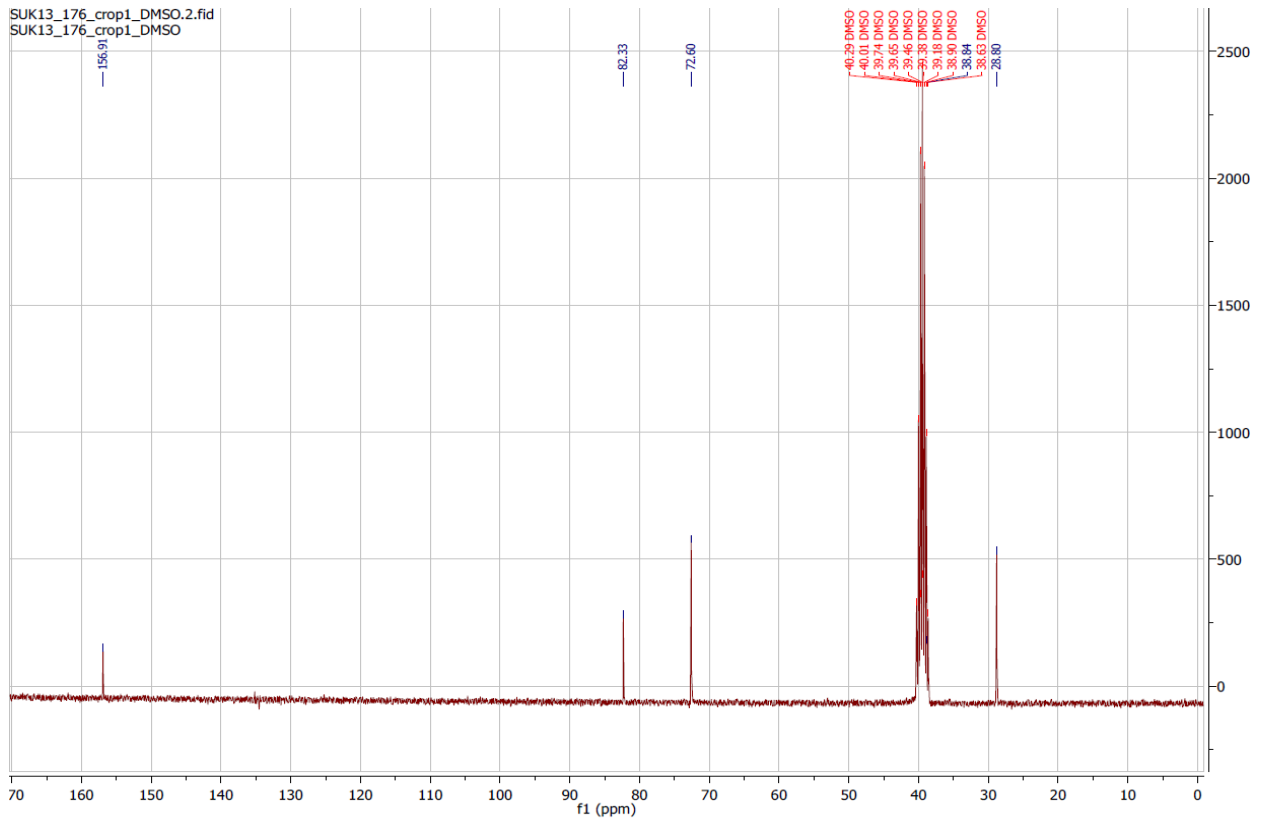

## SEM Images

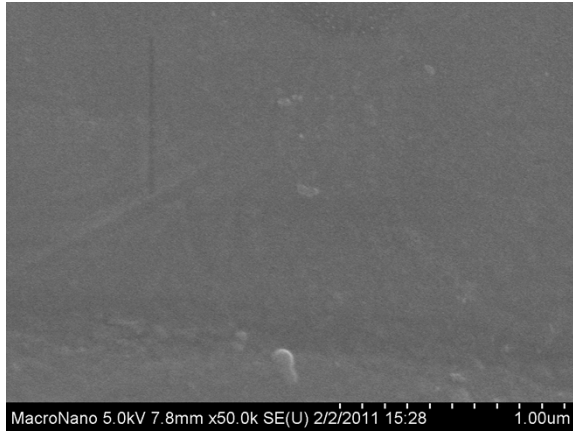

**(A) Treatment of polycarbonate with 0.5% propargyl amine solution in ethanol**

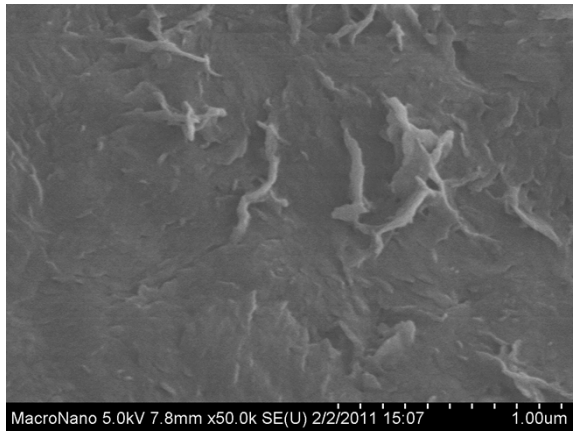

**(B) Treatment of polycarbonate with 2% propargyl amine solution in ethanol**

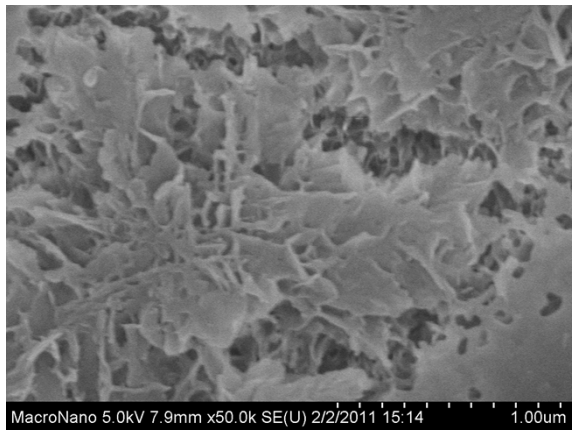

**(C) Treatment of polycarbonate with 5% propargyl amine solution in ethanol**
